# Supplementary material
Source: Copernicus journal article supplement (doi:10.5194/gmd-19-4885-2026)
Supplement: Supplementary file 1 [file gmd-19-4885-2026-supplement.pdf]

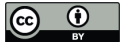

*Supplement of*

**A method for assessing model extensions: application to modelling winter precipitation with a microscale obstacle-resolving meteorological model (MITRAS v3.3)**

**Karolin S. Samsel et al.**

*Correspondence to:* Karolin S. Samsel ([karolin.samsel@uni-hamburg.de](mailto:karolin.samsel@uni-hamburg.de))

The copyright of individual parts of the supplement might differ from the article licence.

**Table S1** : Initialisation profiles for cases Winit and Wwr\_noprecip

| $z$     | $u$ [ $\text{ms}^{-1}$ ] | $v$ [ $\text{ms}^{-1}$ ] | $\theta$ [K] | $p_0$ [hPa] | $\rho_0$ [ $\text{kgm}^3$ ] | $q_1^1$ [ $\text{kgkg}^{-1}$ ] | $q_1^{2c}$ [ $\text{kgkg}^{-1}$ ] |
|---------|--------------------------|--------------------------|--------------|-------------|-----------------------------|--------------------------------|-----------------------------------|
| 1.5     | 0.6294                   | 0.3303                   | 280.81       | 989.82      | 1.2288                      | 0.0037377                      | 0.0                               |
| 4.5     | 0.8676                   | 0.4366                   | 280.81       | 989.46      | 1.2285                      | 0.0037314                      | 0.0                               |
| 7.5     | 1.0135                   | 0.4924                   | 280.81       | 989.1       | 1.2282                      | 0.0037251                      | 0.0                               |
| 10.5    | 1.1195                   | 0.527                    | 280.81       | 988.73      | 1.2278                      | 0.0037187                      | 0.0                               |
| 13.5    | 1.2045                   | 0.5504                   | 280.82       | 988.37      | 1.2275                      | 0.0037124                      | 0.0                               |
| 16.5    | 1.277                    | 0.5669                   | 280.82       | 988.01      | 1.2272                      | 0.0037061                      | 0.0                               |
| 19.5    | 1.3415                   | 0.5785                   | 280.82       | 987.65      | 1.2269                      | 0.0036998                      | 0.0                               |
| 22.5    | 1.4003                   | 0.5863                   | 280.83       | 987.29      | 1.2265                      | 0.0036936                      | 0.0                               |
| 25.5    | 1.4549                   | 0.5912                   | 280.83       | 986.93      | 1.2262                      | 0.0036873                      | 0.0                               |
| 28.5    | 1.5065                   | 0.5934                   | 280.83       | 986.57      | 1.2259                      | 0.003681                       | 0.0                               |
| 31.5    | 1.5545                   | 0.5933                   | 280.83       | 986.21      | 1.2255                      | 0.0036748                      | 0.0                               |
| 34.75   | 1.6042                   | 0.591                    | 280.84       | 985.82      | 1.2252                      | 0.003668                       | 0.0                               |
| 38.55   | 1.6606                   | 0.5852                   | 280.84       | 985.36      | 1.2248                      | 0.0036601                      | 0.0                               |
| 43.0    | 1.7232                   | 0.5747                   | 280.85       | 984.83      | 1.2243                      | 0.0036509                      | 0.0                               |
| 48.2    | 1.7924                   | 0.5575                   | 280.85       | 984.2       | 1.2237                      | 0.0036401                      | 0.0                               |
| 54.3    | 1.868                    | 0.5308                   | 280.86       | 983.47      | 1.223                       | 0.0036275                      | 0.0                               |
| 61.5    | 1.9504                   | 0.4904                   | 280.86       | 982.61      | 1.2223                      | 0.0036127                      | 0.0                               |
| 70.0    | 2.0361                   | 0.4312                   | 280.87       | 981.59      | 1.2213                      | 0.0035953                      | 0.0                               |
| 80.0    | 2.1204                   | 0.3454                   | 280.88       | 980.39      | 1.2202                      | 0.0035749                      | 0.0                               |
| 91.75   | 2.1875                   | 0.2289                   | 280.89       | 978.98      | 1.219                       | 0.0035511                      | 0.0                               |
| 105.55  | 2.2093                   | 0.0692                   | 280.91       | 977.33      | 1.2174                      | 0.0035232                      | 0.0                               |
| 121.75  | 2.0164                   | -0.0467                  | 280.92       | 975.4       | 1.2157                      | 0.0034908                      | 0.0                               |
| 140.8   | 1.9989                   | -0.0007                  | 280.94       | 973.13      | 1.2136                      | 0.003453                       | 0.0                               |
| 163.2   | 2.0                      | -0.0                     | 280.96       | 970.47      | 1.2112                      | 0.003409                       | 0.0                               |
| 189.5   | 2.0                      | -0.0                     | 280.99       | 967.35      | 1.2083                      | 0.0033579                      | 0.0                               |
| 220.4   | 2.0                      | -0.0                     | 281.02       | 963.69      | 1.205                       | 0.0032987                      | 0.0                               |
| 256.7   | 2.0                      | -0.0                     | 281.06       | 959.4       | 1.201                       | 0.0032303                      | 0.0                               |
| 299.35  | 2.0                      | -0.0                     | 281.1        | 954.39      | 1.1964                      | 0.0031515                      | 0.0                               |
| 349.5   | 2.0                      | 0.0                      | 281.15       | 948.52      | 1.191                       | 0.0030609                      | 0.0                               |
| 408.45  | 2.0                      | 0.0                      | 281.2        | 941.65      | 1.1847                      | 0.0029573                      | 0.0                               |
| 477.7   | 2.0                      | 0.0                      | 281.27       | 933.62      | 1.1772                      | 0.0028393                      | 0.0                               |
| 559.05  | 2.0                      | 0.0                      | 281.35       | 924.26      | 1.1686                      | 0.002706                       | 0.0                               |
| 654.65  | 2.0                      | 0.0                      | 281.45       | 913.35      | 1.1584                      | 0.002556                       | 0.0                               |
| 767.0   | 2.0                      | -0.0                     | 281.56       | 900.65      | 1.1465                      | 0.0023889                      | 0.0                               |
| 899.0   | 2.0                      | -0.0                     | 281.69       | 885.89      | 1.1327                      | 0.0022046                      | 0.0                               |
| 1054.1  | 2.0                      | -0.0                     | 281.84       | 868.78      | 1.1165                      | 0.0020037                      | 0.0                               |
| 1236.35 | 2.0                      | -0.0                     | 282.02       | 848.99      | 1.0977                      | 0.0017877                      | 0.0                               |
| 1450.5  | 2.0                      | -0.0                     | 282.24       | 826.16      | 1.0759                      | 0.0015597                      | 0.0                               |
| 1702.15 | 2.0                      | -0.0                     | 282.49       | 799.91      | 1.0506                      | 0.0013241                      | 0.0                               |
| 1997.85 | 2.0                      | -0.0                     | 282.78       | 769.86      | 1.0213                      | 0.0010868                      | 0.0                               |
| 2345.3  | 2.0                      | -0.0                     | 283.13       | 735.63      | 0.98754                     | 0.00085568                     | 0.0                               |
| 2753.55 | 2.0                      | -0.0                     | 283.54       | 696.86      | 0.94881                     | 0.00063942                     | 0.0                               |
| 3224.1  | 2.0                      | -0.0                     | 284.01       | 654.07      | 0.90539                     | 0.00045035                     | 0.0                               |
| 3724.1  | 2.0                      | -0.0                     | 284.51       | 610.76      | 0.86068                     | 0.00030461                     | 0.0                               |
| 4224.1  | 2.0                      | -0.0                     | 285.02       | 569.61      | 0.81743                     | 0.00020182                     | 0.0                               |
| 4724.1  | 2.0                      | -0.0                     | 285.52       | 530.55      | 0.77562                     | 0.00013077                     | 0.0                               |
| 5224.1  | 2.0                      | -0.0                     | 286.03       | 493.5       | 0.73524                     | 8.2699e-05                     | 0.0                               |

**Table S2** : Initialisation profiles for case Wwr, Wwr\_np, and Wice

| $z$     | $u$ [ms <sup>-1</sup> ] | $v$ [ms <sup>-1</sup> ] | $\theta$ [K] | $p_0$ [hPa] | $\rho_0$ [kgm <sup>3</sup> ] | $q_1^1$ [kgkg <sup>-1</sup> ] | $q_1^{2c}$ [kgkg <sup>-1</sup> ] |
|---------|-------------------------|-------------------------|--------------|-------------|------------------------------|-------------------------------|----------------------------------|
| 1.5     | 0.6165                  | 0.338                   | 280.81       | 989.82      | 1.2538                       | 0.0037377                     | 0.02                             |
| 4.5     | 0.8516                  | 0.4476                  | 280.81       | 989.45      | 1.2535                       | 0.0037314                     | 0.02                             |
| 7.5     | 0.9973                  | 0.5059                  | 280.81       | 989.08      | 1.2532                       | 0.0037251                     | 0.02                             |
| 10.5    | 1.1044                  | 0.5425                  | 280.82       | 988.71      | 1.2528                       | 0.0037188                     | 0.02                             |
| 13.5    | 1.1913                  | 0.5675                  | 280.82       | 988.34      | 1.2525                       | 0.0037126                     | 0.02                             |
| 16.5    | 1.2663                  | 0.5852                  | 280.82       | 987.97      | 1.2521                       | 0.0037063                     | 0.02                             |
| 19.5    | 1.3338                  | 0.5978                  | 280.83       | 987.6       | 1.2518                       | 0.0037                        | 0.02                             |
| 22.5    | 1.3959                  | 0.6063                  | 280.83       | 987.23      | 1.2514                       | 0.0036938                     | 0.02                             |
| 25.5    | 1.454                   | 0.6115                  | 280.83       | 986.87      | 1.2511                       | 0.0036875                     | 0.02                             |
| 28.5    | 1.5094                  | 0.6137                  | 280.84       | 986.5       | 1.2507                       | 0.0036813                     | 0.02                             |
| 31.5    | 1.5611                  | 0.6133                  | 280.84       | 986.13      | 1.2504                       | 0.0036751                     | 0.02                             |
| 34.75   | 1.6148                  | 0.6101                  | 280.84       | 985.73      | 1.25                         | 0.0036683                     | 0.02                             |
| 38.55   | 1.6761                  | 0.6028                  | 280.85       | 985.27      | 1.2496                       | 0.0036605                     | 0.02                             |
| 43.0    | 1.7442                  | 0.5897                  | 280.85       | 984.72      | 1.2491                       | 0.0036513                     | 0.02                             |
| 48.2    | 1.8196                  | 0.5682                  | 280.86       | 984.08      | 1.2485                       | 0.0036406                     | 0.02                             |
| 54.3    | 1.9015                  | 0.5349                  | 280.87       | 983.34      | 1.2478                       | 0.003628                      | 0.02                             |
| 61.5    | 1.99                    | 0.4841                  | 280.88       | 982.46      | 1.247                        | 0.0036133                     | 0.02                             |
| 70.0    | 2.0786                  | 0.4101                  | 280.89       | 981.42      | 1.246                        | 0.0035959                     | 0.02                             |
| 80.0    | 2.1601                  | 0.3012                  | 280.9        | 980.19      | 1.2448                       | 0.0035756                     | 0.02                             |
| 91.75   | 2.2086                  | 0.1596                  | 280.91       | 978.76      | 1.2435                       | 0.0035519                     | 0.02                             |
| 105.55  | 2.1846                  | -0.0259                 | 280.93       | 977.08      | 1.2419                       | 0.0035242                     | 0.02                             |
| 121.75  | 2.0027                  | -0.0122                 | 280.95       | 975.11      | 1.2401                       | 0.0034919                     | 0.02                             |
| 140.8   | 2.0                     | -0.0002                 | 280.97       | 972.79      | 1.2379                       | 0.0034542                     | 0.02                             |
| 163.2   | 2.0                     | -0.0                    | 281.0        | 970.07      | 1.2353                       | 0.0034103                     | 0.02                             |
| 189.5   | 2.0                     | -0.0                    | 281.03       | 966.89      | 1.2323                       | 0.0033595                     | 0.02                             |
| 220.4   | 2.0                     | -0.0                    | 281.06       | 963.16      | 1.2288                       | 0.0033005                     | 0.02                             |
| 256.7   | 2.0                     | -0.0                    | 281.11       | 958.79      | 1.2247                       | 0.0032324                     | 0.02                             |
| 299.35  | 2.0                     | 0.0                     | 281.16       | 953.68      | 1.2199                       | 0.0031538                     | 0.02                             |
| 349.5   | 2.0                     | 0.0                     | 281.22       | 947.69      | 1.2142                       | 0.0030636                     | 0.02                             |
| 408.45  | 2.0                     | 0.0                     | 281.29       | 940.69      | 1.2076                       | 0.0029603                     | 0.02                             |
| 477.7   | 2.0                     | 0.0                     | 281.37       | 932.51      | 1.1998                       | 0.0028427                     | 0.02                             |
| 559.05  | 2.0                     | -0.0                    | 281.47       | 922.97      | 1.1907                       | 0.0027097                     | 0.02                             |
| 654.65  | 2.0                     | -0.0                    | 281.58       | 911.85      | 1.1801                       | 0.0025602                     | 0.02                             |
| 767.0   | 2.0                     | -0.0                    | 281.71       | 898.92      | 1.1676                       | 0.0023936                     | 0.02                             |
| 899.0   | 2.0                     | -0.0                    | 281.87       | 883.89      | 1.1531                       | 0.0022096                     | 0.02                             |
| 1054.1  | 2.0                     | -0.0                    | 282.06       | 866.48      | 1.1356                       | 0.002009                      | 0.019459                         |
| 1236.35 | 2.0                     | -0.0                    | 282.27       | 846.37      | 1.114                        | 0.0017933                     | 0.017636                         |
| 1450.5  | 2.0                     | -0.0                    | 282.52       | 823.23      | 1.0889                       | 0.0015653                     | 0.015495                         |
| 1702.15 | 2.0                     | -0.0                    | 282.81       | 796.71      | 1.0601                       | 0.0013294                     | 0.012978                         |
| 1997.85 | 2.0                     | -0.0                    | 283.14       | 766.44      | 1.027                        | 0.0010917                     | 0.010021                         |
| 2345.3  | 2.0                     | -0.0                    | 283.52       | 732.06      | 0.99036                      | 0.00085986                    | 0.007698                         |
| 2753.55 | 2.0                     | -0.0                    | 283.96       | 693.24      | 0.94859                      | 0.00064276                    | 0.0049763                        |
| 3224.1  | 2.0                     | -0.0                    | 284.45       | 650.53      | 0.90214                      | 0.00045281                    | 0.0018393                        |
| 3724.1  | 2.0                     | -0.0                    | 284.96       | 607.42      | 0.85596                      | 0.00030628                    | 0.0                              |
| 4224.1  | 2.0                     | -0.0                    | 285.47       | 566.49      | 0.81295                      | 0.00020293                    | 0.0                              |
| 4724.1  | 2.0                     | -0.0                    | 285.97       | 527.64      | 0.77137                      | 0.00013149                    | 0.0                              |
| 5224.1  | 2.0                     | -0.0                    | 286.48       | 490.8       | 0.73121                      | 8.3154e-05                    | 0.0                              |

**Table S3** : Initialisation profiles for case Cwr and Cice

| $z$     | $u$ [ $\text{ms}^{-1}$ ] | $v$ [ $\text{ms}^{-1}$ ] | $\theta$ [K] | $p_0$ [hPa] | $\rho_0$ [ $\text{kgm}^3$ ] | $q_1^1$ [ $\text{kgkg}^{-1}$ ] | $q_1^{2c}$ [ $\text{kgkg}^{-1}$ ] |
|---------|--------------------------|--------------------------|--------------|-------------|-----------------------------|--------------------------------|-----------------------------------|
| 1.5     | 0.6036                   | 0.342                    | 272.78       | 989.81      | 1.292                       | 0.0021123                      | 0.02                              |
| 4.5     | 0.8359                   | 0.4538                   | 272.79       | 989.43      | 1.2916                      | 0.0021085                      | 0.02                              |
| 7.5     | 0.9813                   | 0.5139                   | 272.79       | 989.05      | 1.2913                      | 0.0021047                      | 0.02                              |
| 10.5    | 1.0893                   | 0.5519                   | 272.79       | 988.67      | 1.2909                      | 0.0021009                      | 0.02                              |
| 13.5    | 1.1779                   | 0.578                    | 272.8        | 988.29      | 1.2905                      | 0.0020971                      | 0.02                              |
| 16.5    | 1.2551                   | 0.5967                   | 272.8        | 987.91      | 1.2902                      | 0.0020934                      | 0.02                              |
| 19.5    | 1.3251                   | 0.6099                   | 272.8        | 987.53      | 1.2898                      | 0.0020896                      | 0.02                              |
| 22.5    | 1.39                     | 0.6189                   | 272.81       | 987.15      | 1.2894                      | 0.0020858                      | 0.02                              |
| 25.5    | 1.451                    | 0.6242                   | 272.81       | 986.77      | 1.2891                      | 0.002082                       | 0.02                              |
| 28.5    | 1.5095                   | 0.6263                   | 272.81       | 986.39      | 1.2887                      | 0.0020783                      | 0.02                              |
| 31.5    | 1.5642                   | 0.6254                   | 272.82       | 986.01      | 1.2883                      | 0.0020745                      | 0.02                              |
| 34.75   | 1.6211                   | 0.6215                   | 272.82       | 985.6       | 1.2879                      | 0.0020705                      | 0.02                              |
| 38.55   | 1.6864                   | 0.6128                   | 272.83       | 985.12      | 1.2875                      | 0.0020657                      | 0.02                              |
| 43.0    | 1.759                    | 0.5975                   | 272.83       | 984.56      | 1.2869                      | 0.0020602                      | 0.02                              |
| 48.2    | 1.8391                   | 0.5725                   | 272.84       | 983.9       | 1.2863                      | 0.0020537                      | 0.02                              |
| 54.3    | 1.9261                   | 0.5338                   | 272.85       | 983.13      | 1.2855                      | 0.0020462                      | 0.02                              |
| 61.5    | 2.0186                   | 0.4751                   | 272.85       | 982.23      | 1.2847                      | 0.0020373                      | 0.02                              |
| 70.0    | 2.1101                   | 0.3885                   | 272.86       | 981.16      | 1.2836                      | 0.0020269                      | 0.02                              |
| 80.0    | 2.1854                   | 0.2642                   | 272.88       | 979.9       | 1.2824                      | 0.0020146                      | 0.02                              |
| 91.75   | 2.2083                   | 0.0974                   | 272.89       | 978.42      | 1.281                       | 0.0020003                      | 0.02                              |
| 105.55  | 2.0603                   | -0.0648                  | 272.91       | 976.69      | 1.2793                      | 0.0019837                      | 0.02                              |
| 121.75  | 1.9988                   | -0.0014                  | 272.93       | 974.66      | 1.2773                      | 0.0019643                      | 0.02                              |
| 140.8   | 2.0                      | -0.0                     | 272.95       | 972.27      | 1.275                       | 0.0019416                      | 0.02                              |
| 163.2   | 2.0                      | -0.0                     | 272.98       | 969.47      | 1.2722                      | 0.0019153                      | 0.02                              |
| 189.5   | 2.0                      | -0.0                     | 273.01       | 966.19      | 1.269                       | 0.0018848                      | 0.02                              |
| 220.4   | 2.0                      | -0.0                     | 273.04       | 962.35      | 1.2653                      | 0.0018495                      | 0.02                              |
| 256.7   | 2.0                      | -0.0                     | 273.09       | 957.85      | 1.2609                      | 0.0018087                      | 0.02                              |
| 299.35  | 2.0                      | 0.0                      | 273.14       | 952.59      | 1.2557                      | 0.0017618                      | 0.02                              |
| 349.5   | 2.0                      | 0.0                      | 273.2        | 946.43      | 1.2497                      | 0.0017079                      | 0.02                              |
| 408.45  | 2.0                      | 0.0                      | 273.27       | 939.22      | 1.2426                      | 0.0016465                      | 0.02                              |
| 477.7   | 2.0                      | 0.0                      | 273.35       | 930.81      | 1.2343                      | 0.0015767                      | 0.02                              |
| 559.05  | 2.0                      | -0.0                     | 273.45       | 920.99      | 1.2246                      | 0.0014979                      | 0.02                              |
| 654.65  | 2.0                      | -0.0                     | 273.56       | 909.56      | 1.2133                      | 0.0014097                      | 0.02                              |
| 767.0   | 2.0                      | -0.0                     | 273.7        | 896.26      | 1.2001                      | 0.0013118                      | 0.02                              |
| 899.0   | 2.0                      | -0.0                     | 273.85       | 880.82      | 1.1847                      | 0.0012042                      | 0.02                              |
| 1054.1  | 2.0                      | -0.0                     | 274.04       | 862.94      | 1.1661                      | 0.0010875                      | 0.019459                          |
| 1236.35 | 2.0                      | -0.0                     | 274.26       | 842.3       | 1.1431                      | 0.00096297                     | 0.017636                          |
| 1450.5  | 2.0                      | -0.0                     | 274.51       | 818.56      | 1.1167                      | 0.00083243                     | 0.015495                          |
| 1702.15 | 2.0                      | -0.0                     | 274.8        | 791.37      | 1.0862                      | 0.00069873                     | 0.012978                          |
| 1997.85 | 2.0                      | -0.0                     | 275.13       | 760.37      | 1.0513                      | 0.00056565                     | 0.010021                          |
| 2345.3  | 2.0                      | -0.0                     | 275.51       | 725.2       | 1.0126                      | 0.00043778                     | 0.007698                          |
| 2753.55 | 2.0                      | -0.0                     | 275.95       | 685.54      | 0.96855                     | 0.00032024                     | 0.0049763                         |
| 3224.1  | 2.0                      | -0.0                     | 276.45       | 641.96      | 0.91965                     | 0.0002197                      | 0.0018393                         |
| 3724.1  | 2.0                      | -0.0                     | 276.96       | 598.05      | 0.87107                     | 0.0001442                      | 0.0                               |
| 4224.1  | 2.0                      | -0.0                     | 277.46       | 556.44      | 0.82583                     | $9.2503e - 05$                 | 0.0                               |
| 4724.1  | 2.0                      | -0.0                     | 277.97       | 517.01      | 0.78216                     | $5.7892e - 05$                 | 0.0                               |
| 5224.1  | 2.0                      | -0.0                     | 278.47       | 479.69      | 0.74004                     | $3.5269e - 05$                 | 0.0                               |

**Table S4** : Initialisation profiles for cases Hwr and Hice

| $z$     | $u$ [ms <sup>-1</sup> ] | $v$ [ms <sup>-1</sup> ] | $\theta$ [K] | $p_0$ [hPa] | $\rho_0$ [kgm <sup>3</sup> ] | $q_1^1$ [kgkg <sup>-1</sup> ] | $q_1^{2c}$ [kgkg <sup>-1</sup> ] |
|---------|-------------------------|-------------------------|--------------|-------------|------------------------------|-------------------------------|----------------------------------|
| 1.5     | 0.6332                  | 0.3299                  | 288.83       | 989.82      | 1.217                        | 0.0063763                     | 0.02                             |
| 4.5     | 0.8721                  | 0.4359                  | 288.83       | 989.46      | 1.2167                       | 0.0063662                     | 0.02                             |
| 7.5     | 1.0181                  | 0.4914                  | 288.84       | 989.1       | 1.2164                       | 0.0063561                     | 0.02                             |
| 10.5    | 1.1238                  | 0.5258                  | 288.84       | 988.75      | 1.2161                       | 0.006346                      | 0.02                             |
| 13.5    | 1.2081                  | 0.5491                  | 288.84       | 988.39      | 1.2157                       | 0.006336                      | 0.02                             |
| 16.5    | 1.2799                  | 0.5654                  | 288.85       | 988.03      | 1.2154                       | 0.0063259                     | 0.02                             |
| 19.5    | 1.3435                  | 0.5769                  | 288.85       | 987.67      | 1.2151                       | 0.0063159                     | 0.02                             |
| 22.5    | 1.4013                  | 0.5848                  | 288.85       | 987.32      | 1.2148                       | 0.0063059                     | 0.02                             |
| 25.5    | 1.4549                  | 0.5897                  | 288.86       | 986.96      | 1.2145                       | 0.0062959                     | 0.02                             |
| 28.5    | 1.5053                  | 0.5921                  | 288.86       | 986.6       | 1.2141                       | 0.0062859                     | 0.02                             |
| 31.5    | 1.5523                  | 0.5923                  | 288.86       | 986.24      | 1.2138                       | 0.0062759                     | 0.02                             |
| 34.75   | 1.6008                  | 0.5902                  | 288.87       | 985.86      | 1.2135                       | 0.0062651                     | 0.02                             |
| 38.55   | 1.6558                  | 0.585                   | 288.87       | 985.4       | 1.2131                       | 0.0062525                     | 0.02                             |
| 43.0    | 1.7167                  | 0.5752                  | 288.88       | 984.88      | 1.2126                       | 0.0062378                     | 0.02                             |
| 48.2    | 1.7839                  | 0.5591                  | 288.88       | 984.26      | 1.212                        | 0.0062206                     | 0.02                             |
| 54.3    | 1.8575                  | 0.5339                  | 288.89       | 983.53      | 1.2114                       | 0.0062005                     | 0.02                             |
| 61.5    | 1.9373                  | 0.4957                  | 288.9        | 982.68      | 1.2106                       | 0.0061768                     | 0.02                             |
| 70.0    | 2.0212                  | 0.4387                  | 288.91       | 981.67      | 1.2097                       | 0.006149                      | 0.02                             |
| 80.0    | 2.1016                  | 0.3573                  | 288.92       | 980.48      | 1.2086                       | 0.0061164                     | 0.02                             |
| 91.75   | 2.1667                  | 0.2414                  | 288.93       | 979.09      | 1.2074                       | 0.0060782                     | 0.02                             |
| 105.55  | 2.1845                  | 0.0924                  | 288.95       | 977.46      | 1.2059                       | 0.0060337                     | 0.02                             |
| 121.75  | 2.0839                  | -0.067                  | 288.97       | 975.54      | 1.2042                       | 0.0059818                     | 0.02                             |
| 140.8   | 1.9989                  | -0.0011                 | 288.99       | 973.29      | 1.2021                       | 0.0059212                     | 0.02                             |
| 163.2   | 2.0                     | -0.0                    | 289.02       | 970.65      | 1.1997                       | 0.0058506                     | 0.02                             |
| 189.5   | 2.0                     | -0.0                    | 289.05       | 967.56      | 1.197                        | 0.0057687                     | 0.02                             |
| 220.4   | 2.0                     | -0.0                    | 289.08       | 963.94      | 1.1937                       | 0.0056736                     | 0.02                             |
| 256.7   | 2.0                     | -0.0                    | 289.13       | 959.69      | 1.1898                       | 0.0055636                     | 0.02                             |
| 299.35  | 2.0                     | -0.0                    | 289.18       | 954.73      | 1.1853                       | 0.0054367                     | 0.02                             |
| 349.5   | 2.0                     | 0.0                     | 289.23       | 948.91      | 1.18                         | 0.0052906                     | 0.02                             |
| 408.45  | 2.0                     | 0.0                     | 289.3        | 942.1       | 1.1738                       | 0.0051231                     | 0.02                             |
| 477.7   | 2.0                     | 0.0                     | 289.38       | 934.15      | 1.1665                       | 0.0049321                     | 0.02                             |
| 559.05  | 2.0                     | 0.0                     | 289.48       | 924.88      | 1.158                        | 0.0047153                     | 0.02                             |
| 654.65  | 2.0                     | 0.0                     | 289.59       | 914.06      | 1.148                        | 0.004471                      | 0.02                             |
| 767.0   | 2.0                     | -0.0                    | 289.73       | 901.47      | 1.1364                       | 0.0041976                     | 0.02                             |
| 899.0   | 2.0                     | -0.0                    | 289.88       | 886.85      | 1.1228                       | 0.0038945                     | 0.02                             |
| 1054.1  | 2.0                     | -0.0                    | 290.06       | 869.89      | 1.1063                       | 0.0035623                     | 0.019459                         |
| 1236.35 | 2.0                     | -0.0                    | 290.28       | 850.29      | 1.0859                       | 0.0032028                     | 0.017636                         |
| 1450.5  | 2.0                     | -0.0                    | 290.53       | 827.73      | 1.0622                       | 0.00282                       | 0.015495                         |
| 1702.15 | 2.0                     | -0.0                    | 290.81       | 801.85      | 1.035                        | 0.0024203                     | 0.012978                         |
| 1997.85 | 2.0                     | -0.0                    | 291.14       | 772.28      | 1.0037                       | 0.0020132                     | 0.010021                         |
| 2345.3  | 2.0                     | -0.0                    | 291.52       | 738.66      | 0.96894                      | 0.0016107                     | 0.007698                         |
| 2753.55 | 2.0                     | -0.0                    | 291.96       | 700.66      | 0.92932                      | 0.0012275                     | 0.0049763                        |
| 3224.1  | 2.0                     | -0.0                    | 292.45       | 658.78      | 0.88519                      | 0.00088539                    | 0.0018393                        |
| 3724.1  | 2.0                     | -0.0                    | 292.95       | 616.45      | 0.84128                      | 0.00061512                    | 0.0                              |
| 4224.1  | 2.0                     | -0.0                    | 293.46       | 576.19      | 0.80036                      | 0.00041939                    | 0.0                              |
| 4724.1  | 2.0                     | -0.0                    | 293.96       | 537.91      | 0.76074                      | 0.0002802                     | 0.0                              |
| 5224.1  | 2.0                     | -0.0                    | 294.47       | 501.54      | 0.72242                      | 0.00018313                    | 0.0                              |
